# Supplementary material
Source: publisher figshare collection journal article supplement (https://acs.figshare.com/ndownloader/files/5665062)
Supplement: Supplementary file 1 [file 5665062]

## Supporting Information

# Carbon nanofiber reinforced non-mulberry silk protein fibroin nanobiocomposite for tissue engineering applications

*Deboki Naskar<sup>Ψ</sup>, Promita Bhattacharjee<sup>±</sup>, Ananta K. Ghosh<sup>Ψ,\*</sup>, Mahitosh Mandal<sup>#</sup>, Subhas C. Kundu<sup>Ψ,†,\*</sup>.*

Ψ Department of Biotechnology, ± Materials Science Centre, and # School of Medical Science and Technology, Indian Institute of Technology Kharagpur, West Bengal 721302, India.

Corresponding authors:

\* Ananta K. Ghosh

E-mail: [aghosh@hijli.iitkgp.ernet.in](mailto:aghosh@hijli.iitkgp.ernet.in); Tel.: +91 3222 283762; Fax: +91 3222 278700

\* Subhas C. Kundu

E-mail: [kundu@hijli.iitkgp.ernet.in](mailto:kundu@hijli.iitkgp.ernet.in); Tel.: +91 3222 283764; Fax: +91 3222 278700

**Figure S1:** Phase contrast micrographs of L929 cells grown on TCP, AmF, AmF-0.1CNF, AmF-1.0CNF and AmF-10.0CNF coated wells for 1, 3 and 5 days. Healthy cells are observed on first four groups during the study course, whereas rounded morphology of cells is seen on the last group. Scale bar = 100  $\mu$ m.

**Table S1:** Some background work on carbon nano tube (CNT)-silk fibroin based nanocomposite biomaterials

**Table S2:** Work already carried out on carbon nano fiber (CNF)-polymer based nanocomposite biomaterials for tissue engineering applications

### Supplemental figure

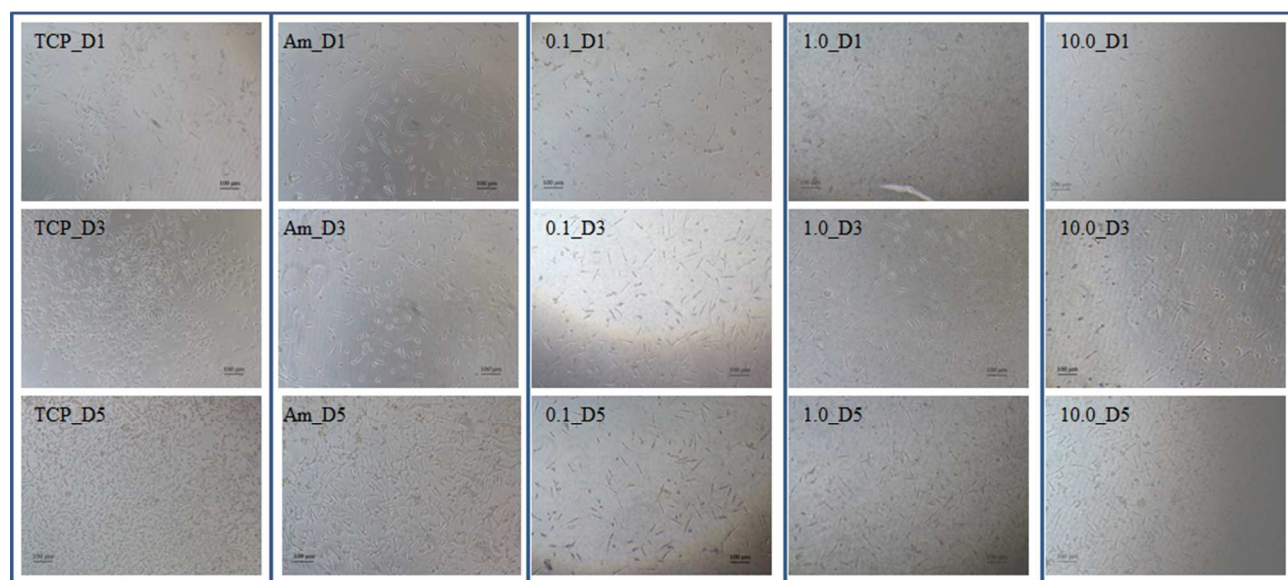

**Figure S1:** Phase contrast micrographs of L929 cells grown on TCP, AmF, AmF-0.1CNF, AmF-1.0CNF and AmF-10.0CNF coated wells for 1, 3 and 5 days. Healthy cells are observed on first four groups during the study course, whereas rounded morphology of cells is seen on the last group. Scale bar = 100  $\mu$ m.

**Table S1:** Some background work on carbon nano tube (CNT)-silk fibroin based nanocomposite biomaterials

| Sl No | Method of CNT functionalization                         | Method of reinforcement                                                                            | Experimental design                                                       | Outcome/Result                                                                                                                     | Concluded applications                                    | Reference         |
|-------|---------------------------------------------------------|----------------------------------------------------------------------------------------------------|---------------------------------------------------------------------------|------------------------------------------------------------------------------------------------------------------------------------|-----------------------------------------------------------|-------------------|
| 1.    | Surfactant based functionalization                      | Dispersion and electrospinning of the blended solution (Solvent: sodium dodecyl benzene sulfonate) | Biophysical and cytocompatibility evaluation                              | Improved mechanical properties, MTT and SEM for lingua mucosa cells of Beagl dog and 3T3 cells                                     | Matrices are cytocompatible                               | <sup>1</sup>      |
| 2.    | As purchased                                            | Dispersion and solvent evaporation of the blended solution (Solvent: water)                        | Human embryonic stem cell neuronal lineage differentiation                | higher $\beta$ -III tubulin and nestin expression suggest augmented neuronal differentiation                                       | Matrices are suitable for nerve repair                    | <sup>2</sup>      |
| 3.    | HNO <sub>3</sub> /H <sub>2</sub> SO <sub>4</sub> /HCl   | Dispersion and solvent evaporation (Solvent: LiBr)                                                 | SEM, TEM, FTIR, WAXD, cytotoxicity and MTT of human bone marrow stem cell | Cells adhered and proliferated on both the silk only and MWCNT-incorporated silk films                                             | Matrices are cytocompatible                               | <sup>3</sup>      |
| 4.    | As purchased                                            | Dispersion directly in aqueous solution of silk fibroin                                            | pH dependent stability of the dispersed blend solution                    | Sol-like behavior under basic (pH 12.0) and gel-like behavior under acidic (pH 4.0) conditions                                     | Matrices may be useful for cancer detection and treatment | <sup>4</sup>      |
| 5.    | High-pressure disproportionation synthesis; formic acid | Dispersion and electrospinning of the blended solution                                             | FESEM, TEM, FTIR, RAMAN, microtensile testing                             | Young's modulus increases up to 460% for the reinforced matrices                                                                   | More study required for proper dispersions and effects    | <sup>5</sup>      |
| 6.    | High-pressure carbon monoxide; formic acid              | Dispersion and electrospinning of the blended solution                                             | Effect of post spinning treatments using FTIR, RAMAN, WAXD.               | 7-fold increase in the strength and 35-fold increase in the modulus, more crystallinity, four times higher electrical conductivity | Matrices may be useful for load bearing applications      | <sup>6</sup>      |
| 7.    | As received; HNO <sub>3</sub> /HCl and formic acid      | Dispersion and electrospinning of the blended solution                                             | FESEM, TEM, RAMAN, tensile                                                | Enhanced tensile property                                                                                                          | Matrices may be useful for wound dressing applications    | <sup>7</sup>      |
| 8.    | HNO <sub>3</sub> /HCl; SDS, CTAB, TritonX100            | Dispersion and stability                                                                           | FESEM, TEM                                                                | Enhanced dispersion of CNT in fibroin solution                                                                                     | -                                                         | <sup>8</sup>      |
| 9.    | HNO <sub>3</sub> /H <sub>2</sub> SO <sub>4</sub>        | Dispersion and freeze drying for cryogel                                                           | FTIR, XRD, FESEM, TEM                                                     | MWCNTs induced a change in fibroin crystal structure. Mesopores and micropores are increased in cryogels                           | -                                                         | <sup>9</sup>      |
| 10.   | HNO <sub>3</sub> /HCl; Triton X100                      | Melt compression molding                                                                           | Tensile strength, SEM.                                                    | Interfacial adhesion between PBS matrix and CNT-coated fiber improved in the composites.                                           | -                                                         | <sup>10, 11</sup> |

**Table S2:** Work already carried out on carbon nano fiber (CNF)-polymer based nanocomposite biomaterials for tissue engineering applications

| Sl No | Method of CNF functionalization                     | Polymer used for base matrix                 | Method of reinforcement                                                                                        | Experimental design                                              | Outcome/Result                                                                             | Concluded applications                                         | Reference     |
|-------|-----------------------------------------------------|----------------------------------------------|----------------------------------------------------------------------------------------------------------------|------------------------------------------------------------------|--------------------------------------------------------------------------------------------|----------------------------------------------------------------|---------------|
| 1.    | As purchased                                        | Polycarbonate urethane (PCU)                 | Dispersion and solvent evaporation (Solvent: Chloroform [ $\text{CHCl}_3$ ])                                   | Cytocompatibility study using only fluorescent adherence count   | Decreased muscle, fibroblast and chondrocyte adhesion and increased osteocyte adhesion     | Matrices are cytocompatible                                    | <sup>12</sup> |
| 2.    | As purchased                                        | PCU                                          | Dispersion and solvent evaporation (Solvent: $\text{CHCl}_3$ )                                                 | Mechanical and electric property. Cytocompatibility evaluations. | Support neural cell function and increased adhesion of osteoblasts.                        | May be useful for neural and bone tissue engineering           | <sup>13</sup> |
| 3.    | As synthesized                                      | PCU                                          | Dispersion and solvent evaporation (Solvent: $\text{CHCl}_3$ )                                                 | Astrocytes (glial scar tissue-forming cells)                     | Limited astrocyte function leading to decreased scar tissue formation                      | Increased neuronal implant efficacy                            | <sup>14</sup> |
| 4.    | As purchased                                        | PCU                                          | Dispersion and solvent evaporation to make patterned film (Solvent: $\text{CHCl}_3$ )                          | Cytocompatibility evaluations                                    | Selective adhesion and alignment of osteoblasts on CNF patterns                            | Electric stimulation may enhance the bone cell growth          | <sup>15</sup> |
| 5.    | As purchased                                        | Poly(lactic-co-glycolic acid)                | Dispersion and solvent evaporation to make film (Solvent: Tetrahydrofuran and $\text{CHCl}_3$ )                | Biophysical and cytocompatibility evaluation                     | Promoted cardiomyocyte and neuron cells adhesion and proliferation                         | Cardiovascular applications due to conductivity                | <sup>16</sup> |
| 6.    | NaOH, water                                         | None                                         | Hydroxyapatite (HAp) synthesized on CNF using simulated body fluid. The purified powder sintered to make disc. | Biophysical characterizations                                    | Strong interfacial bondings and high mechanical strength                                   | Beneficial for load bearing tissue response                    | <sup>17</sup> |
| 7.    | As purchased                                        | Polypropylene with HAp nanorod filler        | Melt compounding and injection molding of the blend powder                                                     | Biophysical and cytocompatibility evaluation                     | Enhanced osteoblast adhesion and proliferation by MTT study                                | Matrices are beneficial for bone tissue engineering            | <sup>18</sup> |
| 8.    | As purchased and non-covalent surfactant absorption | Silk fibroin from <i>A. mylitta</i> silkworm | Dispersion and solvent evaporation to make film (Solvent: TritonX100 and sodium dodecyl sulfate solution)      | Biophysical and cytocompatibility evaluation                     | Enhanced fibroblast adhesion and proliferation by MTT, SEM, live/dead and confocal studies | Applicable for conductive and load bearing tissue regeneration | This study    |

## References:

1. Pan, H.; Zhang, Y. P.; Hang, Y. C.; Shao, H. L.; Hu, X. C.; Xu, Y. M.; Feng, C., Significantly Reinforced Composite Fibers Electrospun from Silk Fibroin/Carbon Nanotube Aqueous Solutions. *Biomacromolecules* **2012**, *13* (9), 2859-2867.
2. Chen, C. S.; Soni, S.; Le, C.; Biasca, M.; Farr, E.; Chen, E. Y.; Chin, W. C., Human Stem Cell Neuronal Differentiation on Silk-carbon Nanotube Composite. *Nanoscale Res Lett* **2012**, *7* (1), 126.
3. Cho, S. Y.; Yun, Y. S.; Kim, E. S.; Kim, M. S.; Jin, H. J., Stem Cell Response to Multiwalled Carbon Nanotube-incorporated Regenerated Silk Fibroin Films. *J Nanosci Nanotechnol* **2011**, *11* (1), 801-805.
4. Kim, H. S.; Yoon, S. H.; Kwon, S. M.; Jin, H. J., pH-sensitive Multiwalled Carbon Nanotube Dispersion with Silk Fibroins. *Biomacromolecules* **2009**, *10* (1), 82-86.
5. Ayutsede, J.; Gandhi, M.; Sukigara, S.; Ye, H.; Hsu, C. M.; Gogotsi, Y.; Ko, F., Carbon Nanotube Reinforced Bombyx mori Silk Nanofibers by the Electrospinning Process. *Biomacromolecules* **2006**, *7* (1), 208-214.
6. Gandhi, M.; Yang, H.; Shor, L.; Ko, F., Post-spinning Modification of Electrospun Nanofiber Nanocomposite from Bombyx mori Silk and Carbon Nanotubes. *Polymer* **2009**, *50* (8), 1918-1924.
7. Kang, M.; Chen, P.; Jin, H. J., Preparation of Multiwalled Carbon Nanotubes Incorporated Silk Fibroin Nanofibers by Electrospinning. *Curr Appl Phys* **2009**, *9*, S95-S97.
8. Kim, H.; Kim, H. S.; Lee, H. S.; Chin, I. J.; Jin, H. J., Dispersion of Multiwalled Carbon Nanotubes in Aqueous Silk Fibroin Solutions. *J Nanosci Nanotechnol* **2008**, *8* (10), 5543-5546.
9. Kwon, S. M.; Kim, H. S.; Jin, H. J., Synthesis and Properties of Multiwalled Carbon Nanotubes Incorporated Organic Silk Fibroin Cryogels. *J Nanosci Nanotechnol* **2009**, *9* (12), 7204-7208.
10. Kim, H. S.; Park, B. H.; Yoon, J. S.; Jin, H. J., Mechanical Properties of Silk Fiber Reinforced Polymer Composites with Carbon Nanotubes. *Key Eng Mater* **2006**, *321-323*, 921-924.
11. Kim, H. S.; Park, B. H.; Yoon, J. S.; Jin, H. J., Preparation and Characterization of Poly[(butylene succinate)-co-(butylene adipate)]/carbon Nanotube-coated Silk Fiber Composites. *Polym Int* **2007**, *56* (8), 1035-1039.
12. Price, R. L.; Waid, M. C.; Haberstroh, K. M.; Webster, T. J., Selective Bone Cell Adhesion on Formulations Containing Carbon Nanofibers. *Biomaterials* **2003**, *24* (11), 1877-1887.
13. Webster, T. J.; Waid, M. C.; McKenzie, J. L.; Price, R. L.; Ejiofor, J. U., Nano-biotechnology: Carbon Nanofibres as Improved Neural and Orthopaedic Implants. *Nanotechnology* **2004**, *15* (1), 48-54.
14. McKenzie, J. L.; Waid, M. C.; Shi, R.; Webster, T. J., Decreased Functions of Astrocytes on Carbon Nanofiber Materials. *Biomaterials* **2004**, *25* (7-8), 1309-1317.
15. Khang, D.; Sato, M.; Price, R. L.; Ribbe, A. E.; Webster, T. J., Selective Adhesion and Mineral Deposition by Osteoblasts on Carbon Nanofiber Patterns. *Int J Nanomedicine* **2006**, *1* (1), 65-72.
16. Stout, D. A.; Basu, B.; Webster, T. J., Poly(lactic-co-glycolic acid): Carbon Nanofiber Composites for Myocardial Tissue Engineering Applications. *Acta biomater* **2011**, *7* (8), 3101-3112.
17. Wu, M. Y.; Wang, Q. Y.; Liu, X. Q.; Liu, H. Q., Biomimetic Synthesis and Characterization of Carbon Nanofiber/hydroxyapatite Composite Scaffolds. *Carbon* **2013**, *51*, 335-345.
18. Liao, C. Z.; Wong, H. M.; Yeung, K. W.; Tjong, S. C., The Development, Fabrication, and Material Characterization of Polypropylene Composites Reinforced with Carbon Nanofiber and Hydroxyapatite Nanorod Hybrid Fillers. *Int J Nanomedicine* **2014**, *9*, 1299-1310.
